# Supplementary material for: Electroacupuncture ameliorates AOM/DSS-induced mice colorectal cancer by inhibiting inflammation and promoting autophagy via the SIRT1/miR-215/Atg14 axis
Source: publisher site journal article supplement (doi:10.18632/aging.205236), 2023-11-22
Supplement: Supplementary file [file aging-v15i22-205236-supplementary-material-SD1.pdf]

**SUPPLEMENTARY FIGURES**

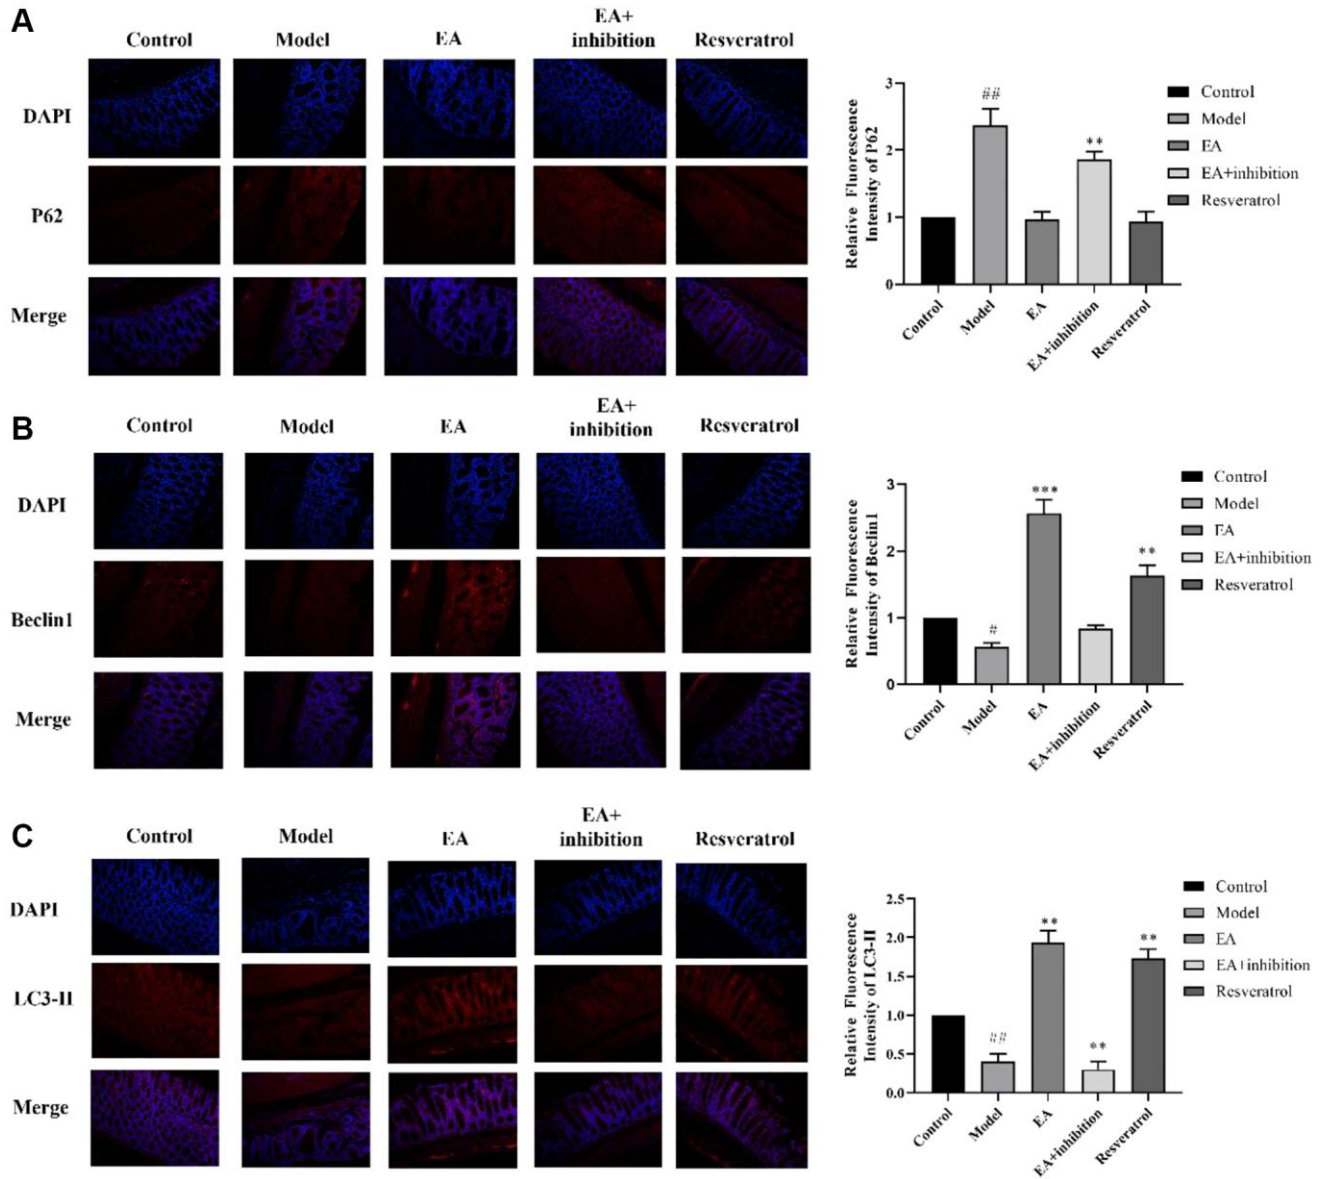

**Supplementary Figure 1. EA promotes autophagy in colon tissue.** (A–C) Immunofluorescence of P62, Beclin 1, LC3-II expression in colon tissue and analysis of the results of the immunofluorescence. <sup>#</sup>*p* < 0.05, <sup>##</sup>*p* < 0.01, compared to the control group; <sup>\*</sup>*p* < 0.05, <sup>\*\*</sup>*p* < 0.01, and <sup>\*\*\*</sup>*p* < 0.001, compared to the model group.

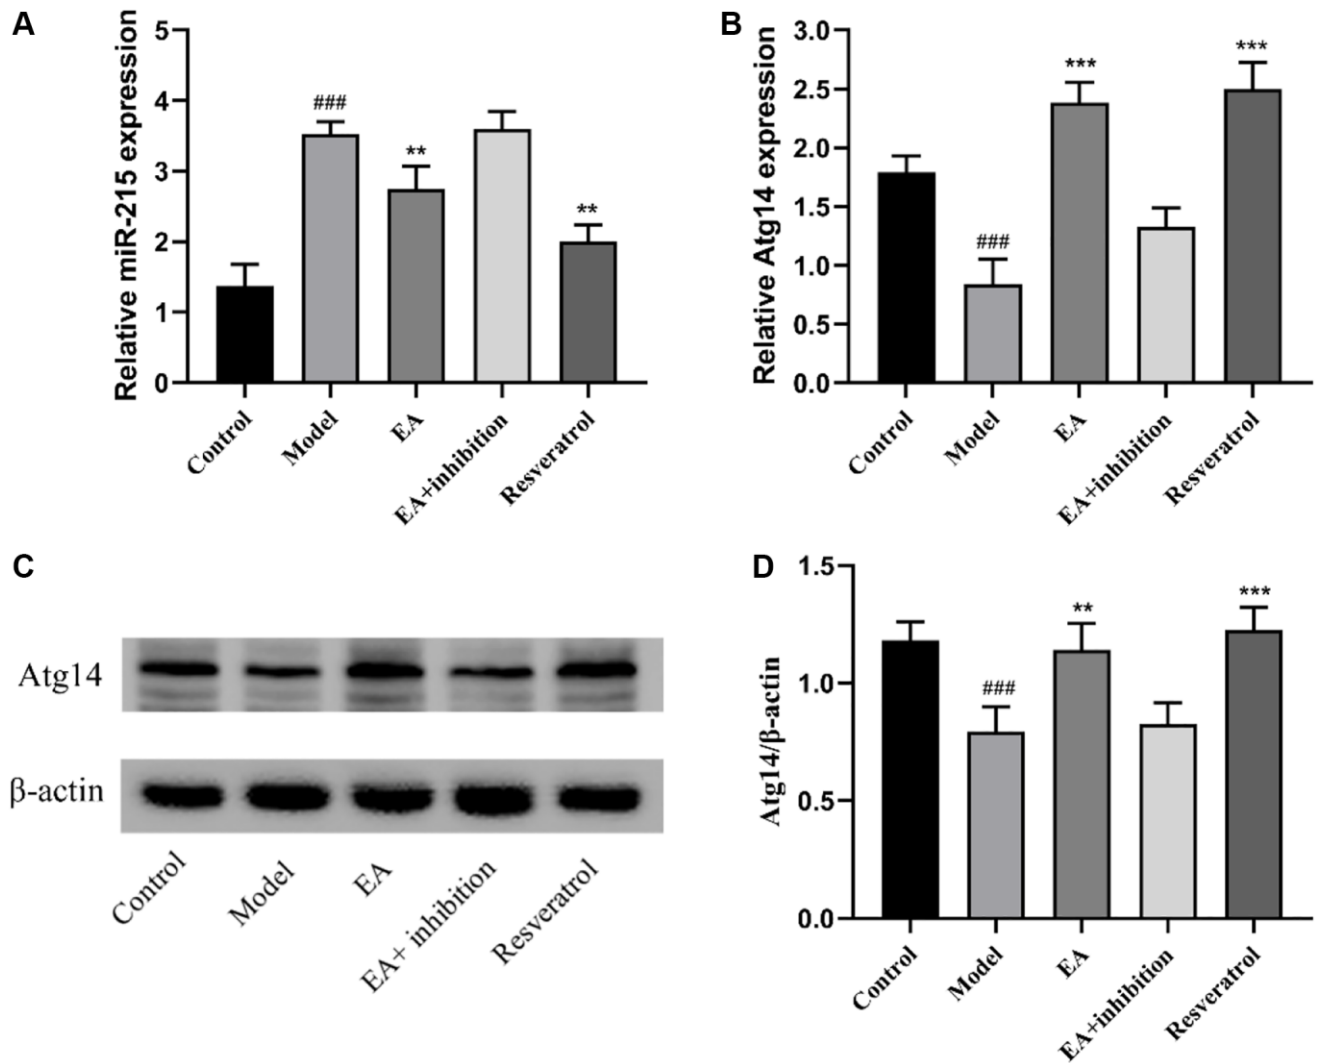

**Supplementary Figure 2. EA inhibited miR-215 expression and promoted Atg14 expression.** (A, B) Expression levels of miR-215 and Atg14 by RT-qPCR. (C) Representative Western blotting graphs showing the expression of Atg14 in colon tissues. (D) Quantitation of the expression contents of Atg14. Data are presented as mean  $\pm$  SD ( $n = 3$ ). <sup>###</sup> $p < 0.001$ , compared to the control group; <sup>\*\*</sup> $p < 0.01$ , and <sup>\*\*\*</sup> $p < 0.001$ , compared to the model group.
